# Supplementary material for: A ratiometric electrochemical sensor for detecting lead in fish based on the synergy of semi-complementary aptamer pairs and Ag nanowires@zeolitic imidazolate framework-8
Source: Royal Society of Chemistry journal article supplement (doi:10.1039/d3ay00196b), 2023-01-01
Supplement: d3ay00196b1.pdf [file d3ay00196b1.pdf]

## Electronic Supporting Information

### A ratiometric electrochemical sensor for detecting lead in fish based on the synergy of semi-complementary aptamer pairs and Ag nanowires@zeolitic imidazolate framework-8

Kuiguo Han<sup>1</sup>, Liang Chen<sup>2</sup>, Wen Zhang<sup>1</sup>, Yanqun Tong<sup>2</sup>, Jiyong Shi<sup>1</sup>, Xiaoyu Su<sup>1</sup>, Xiaobo Zou<sup>1\*</sup>

<sup>1</sup> Department of Food & Biological Engineering, Jiangsu University, Zhenjiang 212013, China

<sup>2</sup> Department of Mechanical Engineering, Jiangsu University, Zhenjiang 212013, China

\*Corresponding authors.

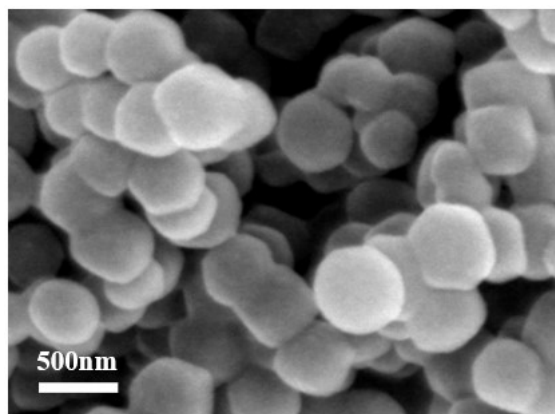

Fig. S1. pure ZIF-8

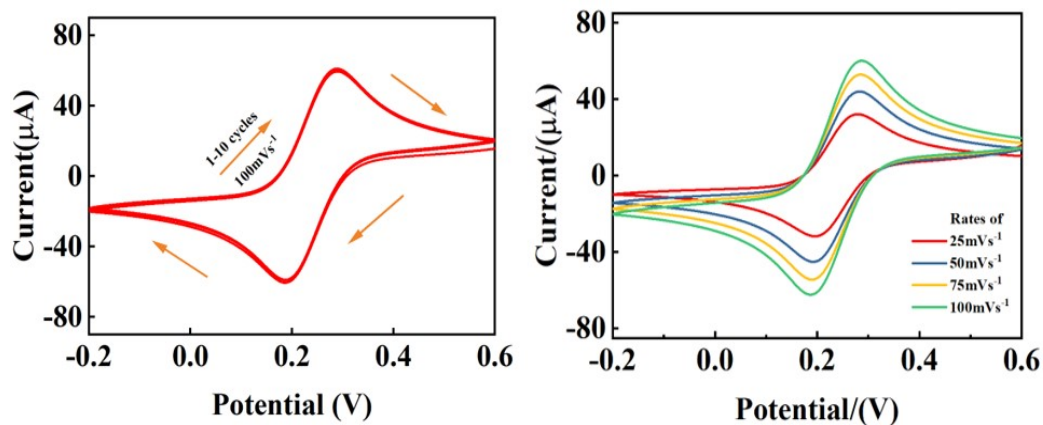

Fig. S2. the performance characteristics of the exposed GCE

Table S1:

| Signal amplification strategy | Linear range              | LOD         | References |
|-------------------------------|---------------------------|-------------|------------|
| DNA/AgNWs@ZIF-8               | 20 nM-9.0 $\mu$ M         | 10nM        | This work  |
| FePc/N,B-rGO                  | 0.05 $\mu$ M-1600 $\mu$ M | 7.1nM       | 1          |
| gold nanofilm                 | 1.0-10 $\mu$ M            | 0.1 $\mu$ M | 2          |
| graphene QD/L-Cys             | 0.1 nM-10 $\mu$ M         | 70nM        | 3          |
| PPy NPs                       | 100nM-50 $\mu$ M          | 55nM        | 4          |
| Au@Py                         | 1.52nM-75.76nM            | 1.82nM      | 5          |
| graphene ultrathin films      | 7.0nM-1.2 $\mu$ M         | 7.0nM       | 6          |

## References

- 1 P. Lei, Y. Zhou, R. Zhu, Y. Liu, C. Dong, S. Shuang, Facile synthesis of iron phthalocyanine functionalized N,B-doped reduced graphene oxide nanocomposites and sensitive electrochemical detection for glutathione, *Sens. Actuators B Chem.*, 2019, 297, 126756.
- 2 H. Wan, Q. Sun, H. Li, F. Sun, N. Hu and P. Wang, Screen-printed gold electrode with gold nanoparticles modification for simultaneous electrochemical determination of lead and copper, *Sensors and Actuators B*, 2015, 209, 336-342.
- 3 Y. Dong, W. Tian, S. Ren, R. Dai, Y. Chi and G. Chen, Graphene quantum Dots/L-Cysteine coreactant electrochemiluminescence system and its application in sensing lead(II) ions, *Applied Materials & Interfaces*, 2014, 6, 1646-1651.
- 4 T. Xu, H.i Dai and Y. Jin, Electrochemical sensing of lead(II) by differential pulse voltammetry using conductive polypyrrole nanoparticles, *Microchimica Acta*, 2020,187, 1-7.
- 5 P.T. Lee, R.G. Compton, Electrochemical detection of NADH, cysteine, or glutathione using a caffeic acid modified glassy carbon electrode, *Electroanalysis*, 2013, 25, 1613-1620.
- 6 Z. Wang, E. Liu, Graphene ultrathin film electrode for detection of lead ions in acetate buffer solution, *Talanta*, 2013,103, 47-55.
